# Supplementary material
Source: publisher site journal article supplement (https://www.dovepress.com/article/380197)
Supplement: Supplementary file 1 [file get_supplementary_file.php]

Supplementary Table1 Comparison of baseline data between RA patients with osteoporosis and non-osteoporosis patients

| **Variables** | **Overall(N=603)** | **Osteoporosis(N=487)** | **Non-osteoporosis(N=116)** | **P-value** |
| --- | --- | --- | --- | --- |
| **Fracture risk (%)** |  |  |  |  |
| No risk | 38 (6.3) | 0 (0.0) | 38 (32.8) | <0.001 |
| Low risk | 53 (8.8) | 0 (0.0) | 53 (45.7) |  |
| Moderate risk | 439 (72.8) | 423 (86.9) | 16 (13.8) |  |
| High-risk | 73 (12.1) | 64 (13.1) | 9 (7.8) |  |
| **Age (median [IQR])** | 69.00 [63.00, 74.00] | 69.00 [63.00, 74.00] | 70.00 [66.00, 73.00] | 0.104 |
| **Sex (%)** |  |  |  |  |
| Male | 395 (65.5) | 301 (61.8) | 94 (81.0) | <0.001 |
| Female | 208 (34.5) | 186 (38.2) | 22 (19.0) |  |
| **BMI (median [IQR]),kg/m2** | 24.00 [23.00, 26.00] | 24.00 [23.00, 26.00] | 24.00 [23.00, 25.00] | 0.172 |
| **Waistline (median [IQR]),cm** | 85.00 [81.00, 89.00] | 85.00 [81.00, 89.00] | 83.00 [80.00, 87.00] | 0.005 |
| **Course of RA (median [IQR]),year** | 7.00 [5.00, 8.00] | 7.00 [6.00, 9.00] | 5.00 [4.00, 6.00] | <0.001 |
| **History of fracture (%)** |  |  |  |  |
| Yes | 43 (7.1) | 37 (7.6) | 6 (5.2) | 0.477 |
| No | 560 (92.9) | 450 (92.4) | 110 (94.8) |  |
| **Smoking (%)** |  |  |  |  |
| Yes | 151 (25.0) | 111 (22.8) | 40 (34.5) | 0.013 |
| No | 452 (75.0) | 376 (77.2) | 76 (65.5) |  |
| **Drinking (%)** |  |  |  |  |
| Yes | 232 (38.5) | 199 (40.9) | 33 (28.4) | 0.018 |
| No | 371 (61.5) | 288 (59.1) | 83 (71.6) |  |
| **Glucocorticoid (%)** |  |  |  |  |
| Yes | 147 (24.4) | 112 (23.0) | 35 (30.2) | 0.134 |
| No | 456 (75.6) | 375 (77.0) | 81 (69.8) |  |
| **Calcium intake (%)** |  |  |  |  |
| Yes | 247 (41.0) | 162 (33.3) | 85 (73.3) | <0.001 |
| No | 356 (59.0) | 325 (66.7) | 31 (26.7) |  |
| **ESR (median [IQR]),mm/h** | 54.30 [49.10, 60.15] | 55.10 [49.60, 61.15] | 52.10 [46.85, 56.87] | <0.001 |
| **CRP (median [IQR]),mg/L** | 16.62 [14.80, 18.56] | 16.79 [14.96, 18.78] | 16.08 [13.87, 17.72] | <0.001 |
| **RF (median [IQR]),IU/mL** | 69.10 [58.65, 79.10] | 70.80 [59.55, 80.40] | 63.70 [57.15, 71.82] | <0.001 |
| **CCP (median [IQR]),U/mL** | 347.00 [316.00, 378.00] | 354.00 [324.00, 382.00] | 324.50 [290.00, 354.00] | <0.001 |
| **25 hydroxyvitamin_D3 (median [IQR]),ng/mL** | 16.76 [14.64, 19.25] | 16.20 [14.29, 18.26] | 22.74 [17.83, 25.06] | <0.001 |
| **Se (median [IQR]), μg/mL** | 34.60 [28.70, 39.90] | 33.60 [27.90, 38.30] | 42.05 [34.45, 47.62] | <0.001 |
| **Osteocalcin (median [IQR]), ng/mL** | 16.70 [12.09, 21.40] | 16.53 [12.09, 21.49] | 17.69 [12.25, 21.03] | 0.824 |
| **Lumbar_BMD (median [IQR]),g/cm2** | 0.94 [0.84, 1.05] | 0.94 [0.84, 1.05] | 0.93 [0.84, 1.05] | 0.966 |
| **Femoral_neck_BMD (median [IQR]), g/cm2** | 0.91 [0.84, 0.98] | 0.90 [0.82, 0.97] | 1.00 [0.90, 1.09] | <0.001 |
| **PMOF (median [IQR]),%** | 4.65 [3.93, 5.46] | 4.86 [4.00, 5.62] | 4.26 [3.60, 4.75] | <0.001 |
| **PHF (median [IQR]),%** | 0.79 [0.60, 0.98] | 0.82 [0.62, 1.01] | 0.74 [0.58, 0.89] | 0.003 |
| **DAS28 (median [IQR]),score** | 5.26 [4.71, 5.84] | 5.27 [4.74, 5.92] | 5.14 [4.69, 5.59] | 0.013 |

Abbreviations: IQR. inter-quartile range;BMI. body mass index. RA. rheumatoid arthritis;ESR. Erythrocyte sedimentation rate;CRP. Serum C-reactive protein;CCP. Anti cyclic citrulline peptide; Se. Serum selenium;BMD. bone density;PMOF. Probability of major osteoporotic fractures;PHF. Probability of hip fracture;DAS28. 28 joint disease activity.

Notes:Drinking. Daily alcohol intake ≥ 3 units; Calcium intake. Calcium intake >600 mg/d.

Supplementary Table2. The candidate variables screening associated with fracture risk via RFC algorithm.

| **Variables** | **Mean decrease accuracy** | **Mean decrease Gini** |
| --- | --- | --- |
| age | 2.142255183 | 0.03288554 |
| sex | -3.23E-37 | 3.64E-16 |
| BMI | 5.148943515 | 0.213084159 |
| waistline | 1.000500375 | 3.33E-15 |
| Course of RA | 5.84498893 | 0.413813807 |
| History of fracture | -6.63E-36 | 1.49E-16 |
| Smoking | -4.85E-21 | 1.13E-16 |
| Drinking | 1.29E-36 | 6.03E-16 |
| Glucocorticoid | -1.00E-34 | 0.008016334 |
| Calcium intake | -1.67E-36 | 4.79E-16 |
| ESR | 1.410031689 | 0.011748834 |
| CRP | 1.000500375 | 0.003766299 |
| RF | 6.578537157 | 0.999049345 |
| CCP | -8.73E-36 | 3.17E-15 |
| Se | 14.39618765 | 5.661670753 |
| Osteocalcin | 1.12524572 | 0.004704709 |
| Lumbar BMD | 9.275484603 | 2.544073511 |
| Femoral neck BMD | 12.8857116 | 4.836774234 |
| PMOF | 22.09773702 | 12.1771673 |
| PHF | 19.91580148 | 10.51727711 |
| DAS28 | 5.219560891 | 0.61064568 |

Abbreviations: BMI. body mass index. RA. rheumatoid arthritis;ESR. Erythrocyte sedimentation rate;CRP. Serum C-reactive protein;CCP. Anti cyclic citrulline peptide; Se. Serum selenium;BMD. bone density;PMOF. Probability of major osteoporotic fractures;PHF. Probability of hip fracture;DAS28. 28 joint disease activity.

Notes. Mean decrease accuracy. This value indicates the reduction of the accuracy of random forest prediction by changing the value of a variable into a random number. The higher the value, the more important the variable is; Mean decrease Gini. This value calculates the impact of each variable on the heterogeneity of observations at each node of the classification tree, so as to compare the importance of variables. The higher the value, the more important the variable is.

Supplementary Table3. Performance for risk prediction models in training and validation cohorts.

| **Training set** | **Sensitivity** | **95%CI** | | **Specificity** | **95%CI** | | **PPV** | **95%CI** | | **NPV** | **95%CI** | |
| --- | --- | --- | --- | --- | --- | --- | --- | --- | --- | --- | --- | --- |
| **Lower** | **Upper** | **Lower** | **Upper** | **Lower** | **Upper** | **Lower** | **Upper** |
| **RFC** | 93.1 | 91.0616 | 95.1384 | 99.04 | 97.0016 | 101.0784 | 90 | 88.0596 | 92.0384 | 99.35 | 97.4292 | 101.3884 |
| **SVM** | 68.97 | 66.9316 | 71.0084 | 97.43 | 95.3916 | 99.4684 | 71.43 | 69.4896 | 73.4684 | 97.12 | 95.1992 | 99.1584 |
| **DT** | 62.07 | 60.0316 | 64.1084 | 96.78 | 94.7416 | 98.8184 | 64.29 | 62.3496 | 66.3284 | 96.47 | 94.5492 | 98.5084 |
| **ANN** | 86.21 | 84.1716 | 88.2484 | 98.71 | 96.6716 | 100.7484 | 86.21 | 84.2696 | 88.2484 | 98.71 | 96.7892 | 100.7484 |
| **XGboost** | 72.41 | 70.3716 | 74.4484 | 97.75 | 95.7116 | 99.7884 | 72.41 | 70.4696 | 74.4484 | 97.44 | 95.5192 | 99.4784 |
| **PMOF** | 51.72 | 49.6816 | 53.7584 | 96.14 | 94.1016 | 98.1784 | 55.56 | 53.6196 | 57.5984 | 95.53 | 93.6092 | 97.5684 |
| **PHF** | 48.28 | 46.2416 | 50.3184 | 96.46 | 94.4216 | 98.4984 | 56 | 54.0596 | 58.0384 | 95.24 | 93.3192 | 97.2784 |
| **Validation set** | **Sensitivity** | **95%CI** | | **Specificity** | **95%CI** | | **PPV** | **95%CI** | | **NPV** | **95%CI** | |
| **Lower** | **Upper** | **Lower** | **Upper** | **Lower** | **Upper** | **Lower** | **Upper** |
| **RFC** | 92.31 | 90.2716 | 94.3484 | 98.51 | 96.4716 | 100.5484 | 50 | 47.9616 | 52.0384 | 99.25 | 97.2116 | 101.2884 |
| **SVM** | 69.23 | 67.1916 | 71.2684 | 95.52 | 93.4816 | 97.5584 | 60 | 57.9616 | 62.0384 | 96.97 | 94.9316 | 99.0084 |
| **DT** | 61.54 | 59.5016 | 63.5784 | 96.27 | 94.2316 | 98.3084 | 61.54 | 59.5016 | 63.5784 | 96.27 | 94.2316 | 98.3084 |
| **ANN** | 76.92 | 74.8816 | 78.9584 | 97.01 | 94.9716 | 99.0484 | 71.43 | 69.3916 | 73.4684 | 97.74 | 95.7016 | 99.7784 |
| **XGboost** | 69.23 | 67.1916 | 71.2684 | 97.01 | 94.9716 | 99.0484 | 69.23 | 67.1916 | 71.2684 | 97.01 | 94.9716 | 99.0484 |
| **PMOF** | 46.15 | 44.1116 | 48.1884 | 96.27 | 94.2316 | 98.3084 | 54.55 | 52.5116 | 56.5884 | 94.85 | 92.8116 | 96.8884 |
| **PHF** | 46.15 | 44.1116 | 48.1884 | 95.52 | 93.4816 | 97.5584 | 50 | 47.9616 | 52.0384 | 94.81 | 92.7716 | 96.8484 |

Abbreviations: RFC. Random Forest Classifier. SVM. Support Vector Machine. DT. Decision Tree. ANN. Artificial Neutral Network. XGboost. eXtreme Gradient boosting. AUC. Area Under Curve. 95%CI. 95% confidence interval. PPV positive predictive value, NPV negative predictive value, 95% CI 95% confidence interval.


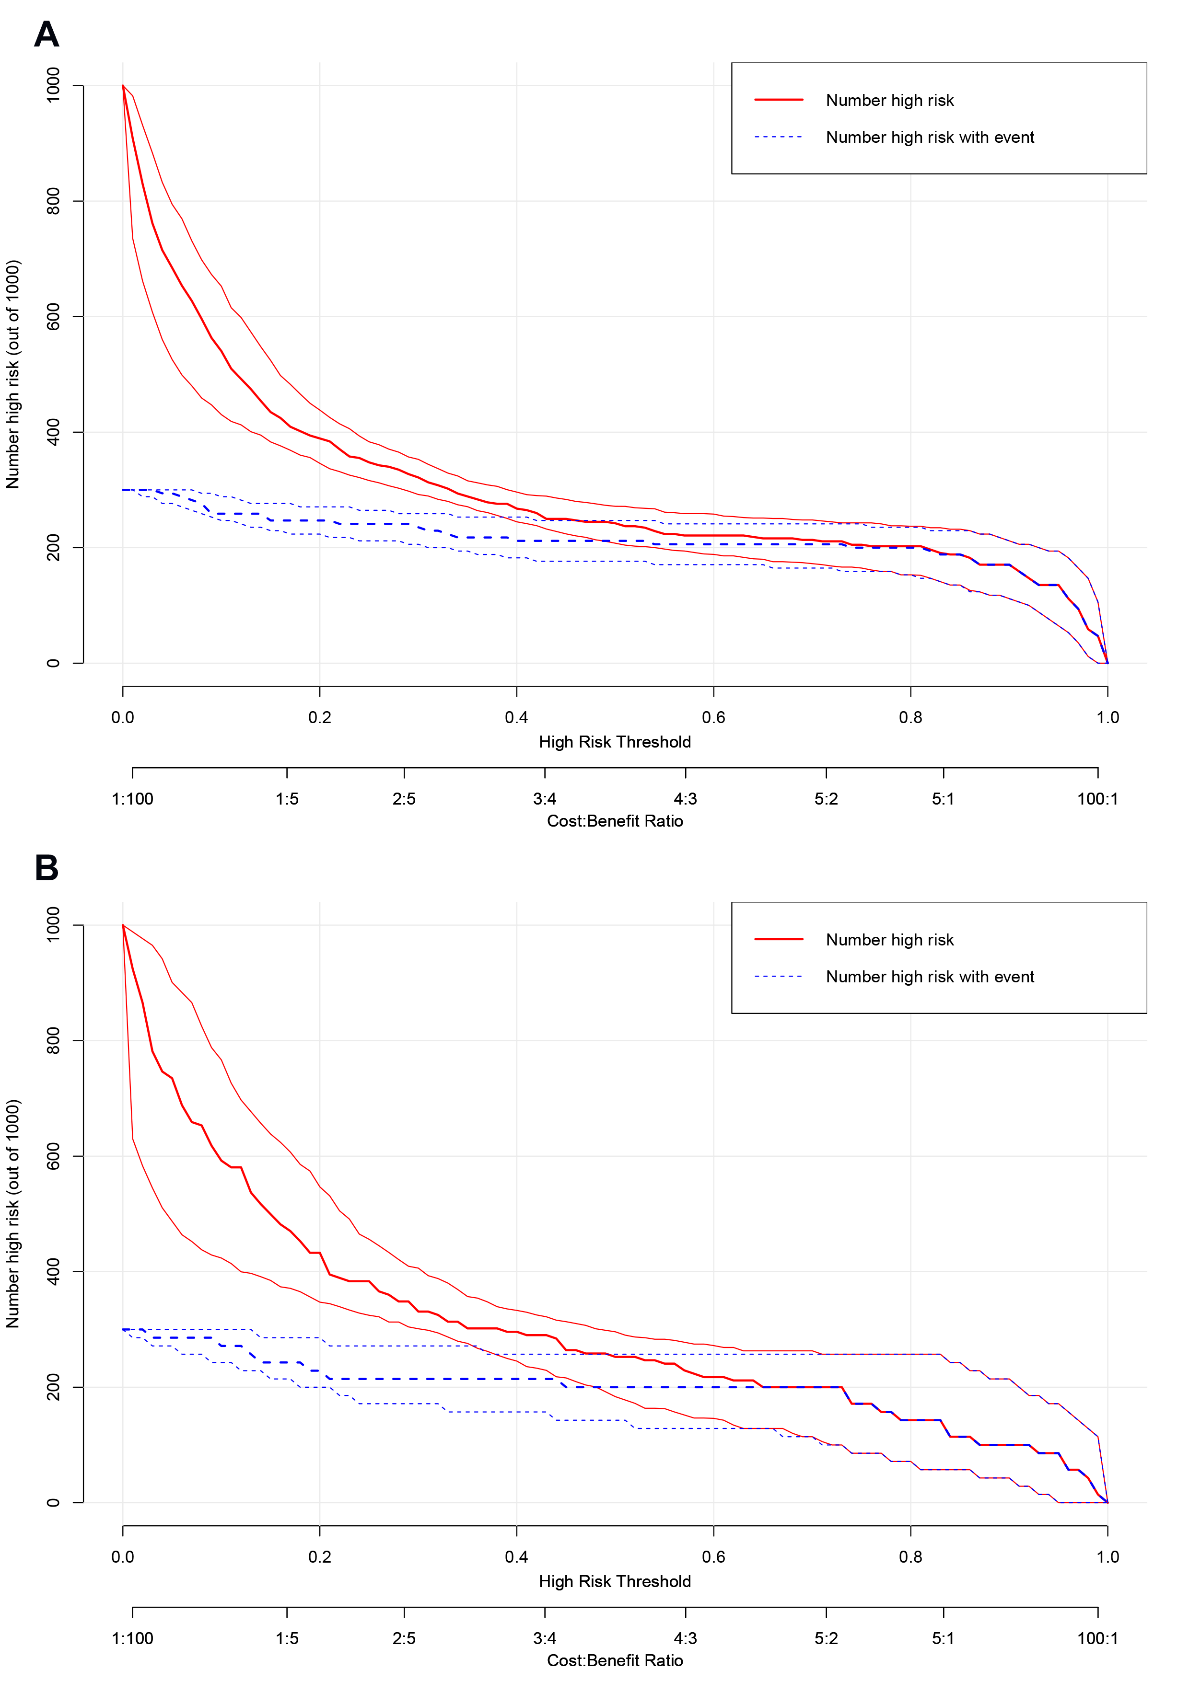


Supplementary Figure1. Prediction performance of RFC model via CIC. A. Training set.B. Validation set.

Notes. The blue curve (number high risk with outcome) indicates the number of true positives under each threshold probability, and the red curve (numberhigh risk) indicates the number of people classified as positive (high risk) by the prediction model under each threshold probability.
